# Supplementary material
Source: PubMed Central journal article supplement (PMC8865051)
Supplement: NIHMS1773907-supplement-8.pdf [file NIHMS1773907-supplement-8.pdf]

| <b>Myeloid</b>      |              |                   |              |                 |
|---------------------|--------------|-------------------|--------------|-----------------|
| <b>Marker</b>       | <b>Color</b> | <b>Company</b>    | <b>Clone</b> | <b>Dilution</b> |
| CD45                | APC cy7      | Biolegend         | 30-F11       | 1:250           |
| CD11c               | bv 786       | BD Biosciences    | HL3          | 1:150           |
| CD19                | PE Cy5       | Biolegend         | 6D5          | 1:500           |
| F4/80               | APC          | Biolegend         | BM8          | 1:250           |
| Ly6G                | bv 711       | Biolegend         | 1A8          | 1:250           |
| MHC II              | bv 510       | Biolegend         | M5/114.15.2  | 1:500           |
| DAPI                | UV           | ThermoFisher      | n/a          | 1:500           |
| CD11b               | PE Cy7       | Invitrogen        | M1/70        | 1:150           |
| <b>T cell</b>       |              |                   |              |                 |
| <b>Marker</b>       | <b>Color</b> | <b>Company</b>    | <b>Clone</b> | <b>Dilution</b> |
| CD45                | APC Cy 7     | Biolegend         | 30-F11       | 1:250           |
| CD11c               | bv 786       | Fisher Sci        | HL3          | 1:150           |
| CD3                 | PE Cy7       | Biolegend         | 145-2C11     | 1:500           |
| CD8a                | bv 711       | Biolegend         | 53-6.7       | 1:250           |
| MHC II              | bv 510       | Biolegend         | M5/114.15.2  | 1:500           |
| CD80                | PE Cy5       | Invivogen         | B7-1         | 1:500           |
| CD4                 | APC          | BD Biosciences    | RM4-5        | 1:500           |
| DAPI                | UV           | ThermoFisher      | n/a          | 1:500           |
| <b>OVA tetramer</b> |              |                   |              |                 |
| <b>Marker</b>       | <b>Color</b> | <b>Company</b>    | <b>Clone</b> | <b>Dilution</b> |
| OVA tetramer        | PE           | NIH Tetramer Core | n/a          | 1:100           |
| OVA                 | FITC         | n/a               | n/a          | n/a             |
| CD8a                | PE Cy7       | Biolegend         | 53-6.7       | 1:250           |
| CD11c               | bv 786       | BD Biosciences    | HL3          | 1:150           |
| DAPI                | UV           | ThermoFisher      | n/a          | 1:500           |
| CD4                 | APC          | BD Biosciences    | RM4-5        | 1:500           |

**Supplementary Table 1: Flow cytometry antibody panels.** Antibodies used for flow cytometry to evaluate myeloid, T cell and tetramer populations.

| Score | Liver                                                                                                            | Kidney                                                                                         | Fibrotic capsule                                                                                           |
|-------|------------------------------------------------------------------------------------------------------------------|------------------------------------------------------------------------------------------------|------------------------------------------------------------------------------------------------------------|
| 0     | normal liver, no lesions or hepatocellular damage noted                                                          | normal kidney, no nephritic or inflammatory cell infiltrates noted                             | normal subcutaneous tissue, no inflammatory cell infiltrates noted outside of capsule                      |
| 1     | rare portal and parenchymal infiltrates but no necrosis                                                          | rare inflammation in interstitium without necrosis                                             | rare inflammation in inflammation without necrosis                                                         |
| 2     | moderate parenchymal or portal infiltrates but no necrosis                                                       | moderate inflammation or hyalinization of glomeruli but no necrosis                            | moderate inflammation or evidence of inflammatory cell infiltrates or chronic inflammation but no necrosis |
| 3     | frequent and/or large portal or parenchymal infiltrates with occasional isolated islands of coagulative necrosis | frequent and/or large inflammation or cellular infiltrates with occasional islands of necrosis | frequent and/or large inflammation and/or evidence of giant cells with occasional islands of necrosis      |
| 4     | extensive areas of inflammation with bridging coagulative necrosis                                               | extensive areas of inflammation and glomerular hyalinization with necrosis                     | extensive areas of inflammation and and/or many giant cells with thick fibrotic capsule                    |

311

**Supplementary Table 2: Histopathological analysis criteria.** Histopathological scoring criteria for assessing inflammation and toxicity in H&E stained slides of liver, kidney and subcutaneous tissues.

312  
313  
314  
315  
316  
317  
318  
319  
320  
321  
322  
323  
324  
325  
326  
327  
328  
329  
330

411

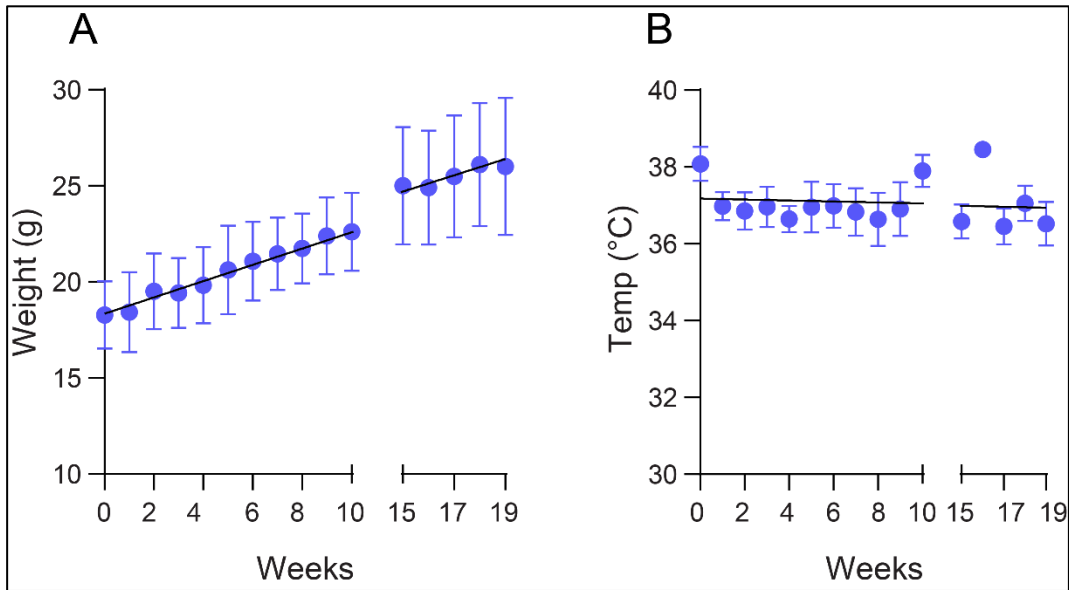

412

**Supplementary Figure 1: Extended NanoLymph Implantation.** (A) Mice weight over 19 weeks post-implantation. (B) Mice temperature over 19 weeks post-implantation. Graphs are plotted as mean  $\pm$  SD.

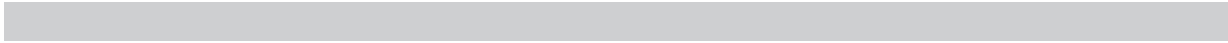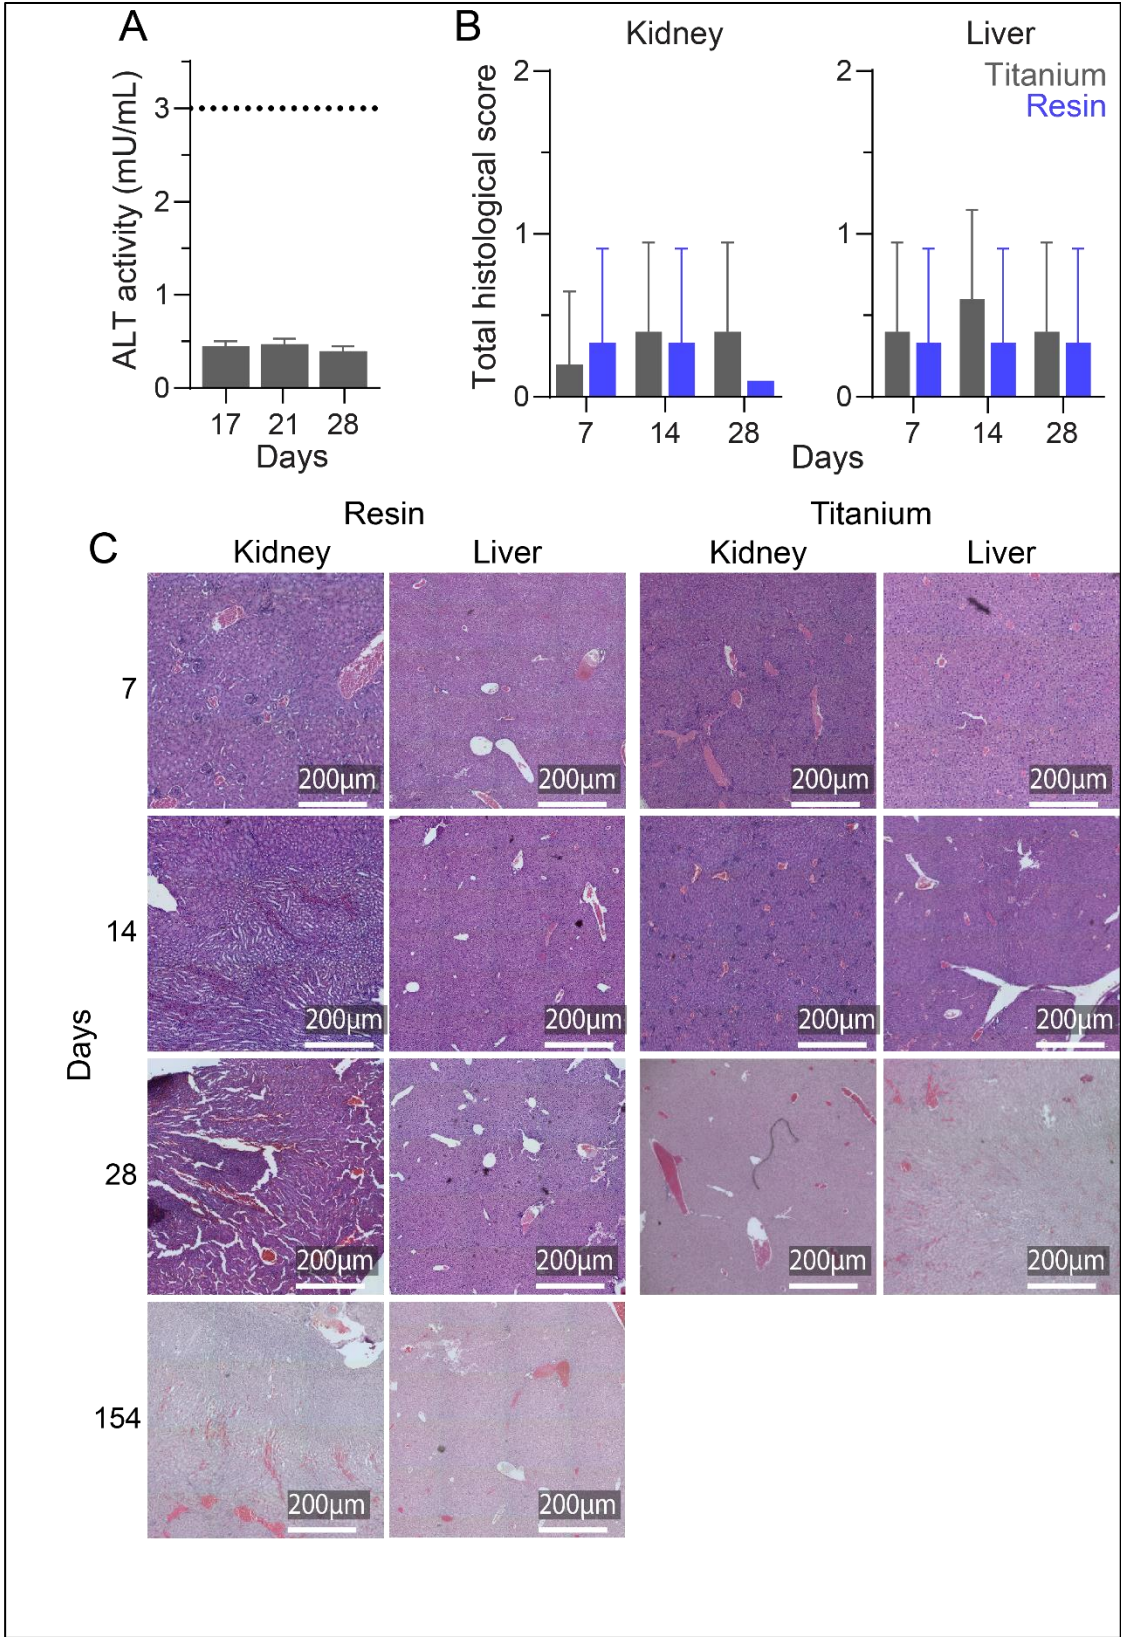

**Supplementary Figure 2: Evaluation of NanoLymph induced toxicity.** (A) ALT liver enzymes in serum of implanted mice. Dotted line indicates value of positive control. (B) Pathological scoring of histological sections of kidney and liver. (C) Hematoxylin and Eosin (H&E) stained kidney and liver at 7, 14, 28 and 154 weeks post-implantation with NanoLymph versus titanium control. Resin in gray, titanium in blue. Scale bar 200  $\mu\text{m}$ . Graphs are plotted as mean  $\pm$  SD. Statistical significance determined via one-way ANOVA. \* $P \leq 0.05$ , \*\* $P \leq 0.01$  and \*\*\* $P \leq 0.001$ .

414  
415  
416  
417  
418  
419  
420  
421  
422  
423  
424  
425  
426  
427  
428  
429  
430  
431  
432  
433  
434  
435  
436  
437  
438  
439  
440  
441  
442  
443  
444  
445  
446  
447  
448  
449  
450  
451

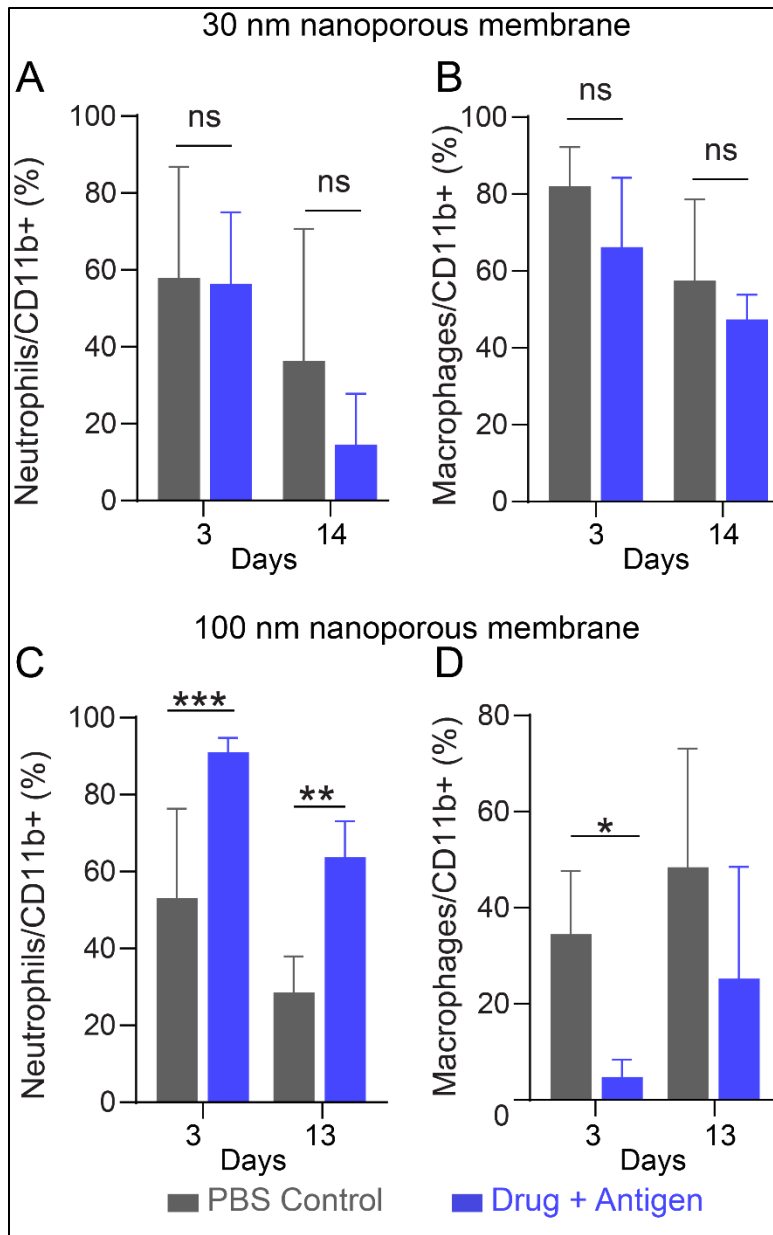

**Supplementary Figure 3: NanoLymph with smaller nanoporous membranes induce minimal inflammatory cell infiltrate.** NanoLymph mounted with 30nm nanoporous membranes, recruitment of (A) neutrophil and (B) macrophages at 3 and 13/14 days. NanoLymph mounted with 100nm nanoporous membranes, recruitment of (C) neutrophil and (D) macrophages at 3 and 13/14 days. Control NanoLymph in gray, Drug/Antigen NanoLymph in blue. \* $P \leq 0.05$ , \*\* $P \leq 0.01$  and \*\*\* $P \leq 0.001$ . Graphs are plotted as mean  $\pm$  SD. Statistical significance determined via two-way ANOVA.

474

475

476

477

478

512

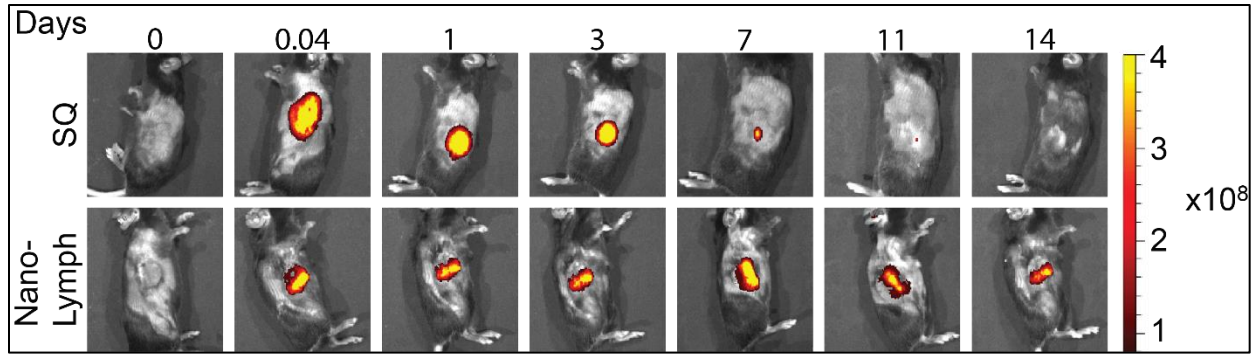

**Supplementary Figure 4: NanoLymph refillability and drug retention in vivo after long-term implantation.** IVIS analysis of Qdot 705 injected SQ or within NanoLymph at various time points in age-matched mice implanted with NanoLymph for 22 weeks.

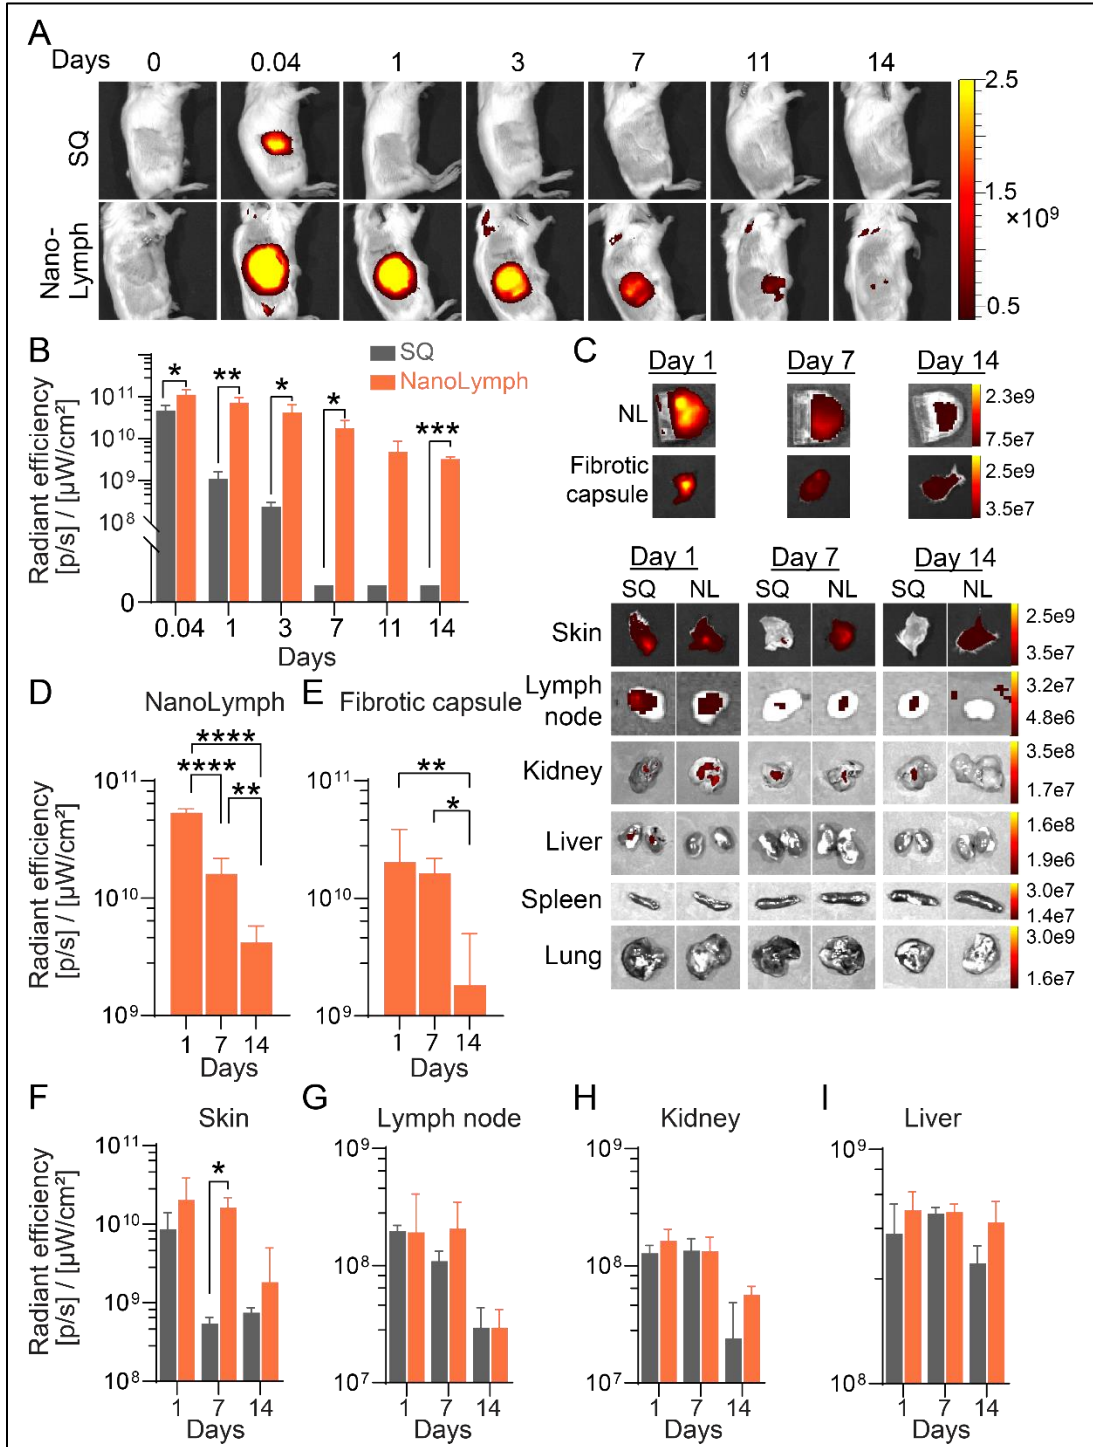



**Supplementary Figure 5: Antigen retention within NanoLymph.** (A) IVIS analysis of ovalbumin conjugated to Alexa Fluor 647 (OVA-AF647) in the antigen reservoir in implanted NanoLymph compared to injected subcutaneous (SQ) control. (B) Relative radiance analysis by IVIS of OVA-AF647 comparing SQ (grey) to NanoLymph drug reservoir (orange) across time points in vivo. (C) Ex vivo IVIS images of OVA-AF647 in organs comparing NanoLymph (NL) to bolus injected SQ. Relative radiance analysis by IVIS of OVA-AF647 in (D) NanoLymph and (E) fibrotic capsule and (E) skin surrounding implant. (F) Relative radiance analysis by IVIS of OVA-AF647 in (G) inguinal lymph node, (H) kidney and (I) liver. \*P ≤ 0.05, \*\*P ≤ 0.01 and \*\*\*P ≤ 0.001. Graphs are plotted as mean ± SD. Statistical significance determined via two-way ANOVA.

557  
558  
559  
560  
561  
562  
563  
564  
565  
566  
567  
568  
569  
570  
571  
572  
573  
574  
575  
576  
577  
578  
579  
580  
581  
582  
583  
584  
585  
586  
587  
588  
589  
590  
591  
592  
593
